# Supplementary material for: Effects of Prenatal Phthalate Exposure and Childhood Exercise on Maternal Behaviors in Female Rats at Postpartum: A Role of Oxtr Methylation in the Hypothalamus
Source: MDPI journal article supplement (doi:10.3390/ijms22189847), 2021-09-12
Supplement: s1 [file s1]

Table S1: Correlation between maternal behaviors and *Oxtr* methylation, Table S2: The development of F1 female rats, Table S3: The litter size and sex ratio in F2 offspring, Table S4: Primers sequences.

Supplementary Materials Table S1  
Correlation between maternal behaviors and *Oxtr* methylation

|                         |             | CpG sites |       |       |       |       |       |       |       |        |       |       |       |
|-------------------------|-------------|-----------|-------|-------|-------|-------|-------|-------|-------|--------|-------|-------|-------|
|                         | <i>Oxtr</i> | 1         | 2     | 3     | 4     | 5     | 6     | 7     | 8     | 9      | 10    | 11    | 12    |
| <i>Oxtr</i> expression  | 1.00        | -0.31     | -0.30 | -0.29 | -0.28 | -0.22 | -0.16 | 0.10  | -0.10 | -0.43* | -0.27 | -0.16 | -0.35 |
| First retrieval latency | -0.63***    | 0.38      | 0.28  | 0.40  | 0.45* | 0.05  | 0.03  | -0.25 | 0.24  | 0.32   | 0.35  | 0.19  | 0.35  |
| Retrieval time          | 0.61***     | -0.24     | -0.10 | -0.26 | -0.31 | -0.14 | -0.20 | 0.14  | -0.06 | -0.30  | -0.25 | -0.11 | -0.25 |
| Retrieved pups          | 0.37        | 0.04      | 0.13  | 0.06  | -0.20 | -0.09 | -0.16 | 0.00  | -0.11 | -0.21  | 0.08  | -0.07 | -0.12 |
| Licking time            | 0.62***     | -0.38     | -0.39 | -0.25 | -0.39 | -0.27 | -0.21 | -0.05 | -0.29 | -0.43* | -0.26 | -0.31 | -0.38 |
| Nursing time            | -0.31       | -0.15     | -0.09 | 0.02  | -0.26 | -0.14 | -0.07 | -0.21 | -0.30 | -0.08  | -0.02 | -0.11 | -0.15 |
| Self-grooming time      | 0.08        | 0.08      | 0.11  | 0.20  | -0.07 | 0.03  | 0.12  | 0.03  | 0.03  | 0.07   | 0.13  | 0.19  | 0.08  |

  

|                         |       | CpG sites |        |          |          |        |        |       |       |       |       |       |       |    |
|-------------------------|-------|-----------|--------|----------|----------|--------|--------|-------|-------|-------|-------|-------|-------|----|
|                         |       | 13        | 14     | 15       | 16       | 17     | 18     | 19    | 20    | 21    | 22    | 23    | 24    | 25 |
| <i>Oxtr</i> expression  | -0.35 | -0.36     | -0.33  | -0.41*   | -0.45*   | -0.34  | -0.32  | 0.10  | 0.05  | -0.19 | -0.04 | 0.15  | -0.01 |    |
| First retrieval latency | 0.23  | 0.39      | 0.31   | 0.52*    | 0.46*    | 0.34   | 0.20   | -0.05 | 0.07  | 0.21  | 0.12  | -0.23 | -0.11 |    |
| Retrieval time          | -0.25 | -0.28     | -0.28  | -0.34    | -0.27    | -0.30  | -0.41* | 0.08  | -0.15 | -0.13 | -0.02 | 0.17  | 0.03  |    |
| Retrieved pups          | -0.17 | -0.05     | -0.23  | -0.21    | -0.17    | -0.22  | -0.13  | -0.06 | -0.04 | -0.18 | -0.21 | 0.09  | 0.08  |    |
| Licking time            | -0.34 | -0.29     | -0.47* | -0.57*** | -0.61*** | -0.46* | -0.16  | -0.04 | 0.00  | -0.37 | -0.14 | 0.31  | 0.17  |    |
| Nursing time            | 0.01  | 0.11      | -0.17  | -0.13    | -0.07    | -0.19  | -0.03  | 0.13  | -0.10 | -0.23 | -0.26 | 0.03  | 0.17  |    |
| Self-grooming time      | -0.19 | 0.21      | 0.00   | -0.02    | -0.17    | -0.25  | -0.08  | -0.10 | 0.07  | -0.15 | 0.04  | 0.34  | 0.29  |    |

-1.001.00

Correlation coefficient

Supplementary Materials Table S2  
The development of F1 female rats

**Table S2: Effects of prenatal DEHP exposure and childhood exercise on body weight of F1 females**

| Observed categories | Groups (Mean ± SEM) |             |             |             | Effect (F value ) |          |
|---------------------|---------------------|-------------|-------------|-------------|-------------------|----------|
|                     | C                   | Cex         | D           | Dex         | DEHP              | Exercise |
| Postnatal 3 weeks   | 40.26±0.96          | 40.35±1.03  | 38.69±0.34  | 38.57±0.36  | 5.007*            | 0.000    |
| Postnatal 4 weeks   | 60.16±0.96          | 61.43±0.84  | 59.53±0.85  | 58.38±0.75  | 4.677*            | 0.006    |
| Postnatal 5 weeks   | 95.66±2.34          | 93.71±1.95  | 92.53±1.45  | 91.79±1.20  | 1.978             | 0.564    |
| Postnatal 6 weeks   | 140.82±3.02         | 135.37±2.84 | 136.73±3.07 | 132.13±3.57 | 1.366             | 2.566    |
| Postnatal 7 weeks   | 180.70±3.11         | 172.40±3.21 | 178.04±2.70 | 171.07±2.70 | 0.460             | 6.740*   |
| Postnatal 8 weeks   | 235.66±2.92         | 224.38±4.08 | 231.33±4.02 | 222.66±4.23 | 0.616             | 6.722*   |

C: vehicle control; Cex: exercised vehicle; D: DEHP exposure; Dx: exercised DEHP  
\*: p < 0.05

Supplementary Materials Table S3  
The litter size and sex ratio in F2 offspring

| Observed categories        | Groups (Mean ± SEM) |           |           |           | Effect (F value ) |          |
|----------------------------|---------------------|-----------|-----------|-----------|-------------------|----------|
|                            | C                   | Cex       | D         | Dex       | DEHP              | Exercise |
| Number of male offspring   | 6.08±0.36           | 5.75±0.35 | 5.83±0.32 | 5.50±0.38 | 0.501             | 0.891    |
| Number of female offspring | 6.50±0.23           | 5.75±0.39 | 6.58±0.29 | 6.17±0.32 | 0.637             | 3.466    |
| Male-to-female ratio       | 0.93±0.04           | 1.07±0.11 | 0.91±0.07 | 0.91±0.07 | 1.385             | 0.825    |

C: vehicle control; Cex: exercised vehicle; D: DEHP exposure; Dx: exercised DEHP

Supplementary Materials Table S4  
Primers sequences

| Primer Name                                | Primer Sequence                                                               |
|--------------------------------------------|-------------------------------------------------------------------------------|
| <b>Primers for RT-PCR</b>                  |                                                                               |
| Forward                                    | 5'-CTGGATATGCGCAAGTGTCTTC-3'                                                  |
| Reverse                                    | 5'-GAAGGAAGCGCCCTAAAGGTAT-3'                                                  |
| <b>Bisulfite specific primers</b>          |                                                                               |
| Oxtr_rn_CpG1-17_BSP-255bp-F                | 5'-GGAAGTTGTATTGTAGTGGATGGTTTT-3'                                             |
| Oxtr_rn_CpG1-17_BSP-255bp-R                | 5'-AATACTACAACCTCCRACTCCAACATAA-3'                                            |
| Oxtr_rn_CpG10-25_BSP-291bp-F               | 5'-GGATGTYGTAGGAAGATAAGAGAGAGTT-3'                                            |
| Oxtr_rn_CpG10-25_BSP-291bp-R               | 5'-CACTTTCCAAAATTCCAATATCTCTAAA-3'                                            |
| Illumina primer overhang universal adapter | 5'-AATGATACGGCGACCACCGAGATCTACACTCTTTCCCTACACGACGCTCTTCCGATCT-3'              |
| Illumina primer overhang index adapter     | 5'-GATCGGAAGAGCACACGTCTGAACTCCAGTCAC-XX<br>XXXXXX-ATCTCGTATGCCGTCTTCTGCTTG-3' |
